# Supplementary material for: High pathogenicity avian influenza A (H5N1) clade 2.3.4.4b virus infection in a captive Tibetan black bear (Ursus thibetanus): investigations based on paraffin-embedded tissues, France, 2022
Source: PubMed Central journal article supplement (PMC10913436; doi:10.1128/spectrum.03736-23), 2024-02-02
Supplement: spectrum.03736-23-s0003.pdf [file spectrum.03736-23-s0003.pdf]

**Supplemental File 1: bear blood analysis results.**

Analysis was performed by the zoo veterinarian prior to the bear death.

**Complete blood count:**

Red blood cells:  $8.01 \times 10^{12}/L$

Hematocrit: 4.8%

Hemoglobin: 17.6g/dL

Mean corpuscular volume: 59.7fL

Mean corpuscular hemoglobin: 21.9pg

Mean corpuscular hemoglobin concentration: 36.7g/dL

Red cell distribution width: 16.1%

% Reticulocyte: 16.1%

Reticulocytes: 31,6 K/ $\mu$ L

White blood cells:  $1.80 \times 10^9/L$

Neutrophils: 37.2%

Lymphocytes: 56.0%

Monocytes: 2.9%

Eosinophiles: 3.9%

Basophiles: 0%

Platelets: 36 K/ $\mu$ L

**Blood biochemistry:**

Glucose: 1.52g/L

Creatinine: 60mg/L

Urea: 0.436g/L

Total protein: 83g/L

Albumin: 39g/L

Globulin: 44g/L

Alanine transaminase: 225U/L

Alkaline phosphatase: 41U/L

C reactive protein: < 1mg/L
